# Supplementary material
Source: Springer Nature journal article supplement (https://www.springermedizin.de/resource/supplementary/12986_2009_231_MOESM1_ESM.pdf/25655638)

○ LETO, Standard      △ OLETF, Standard  
 ● LETO, High fat      ▲ OLETF, High fat

□ Standard      ■ High fat

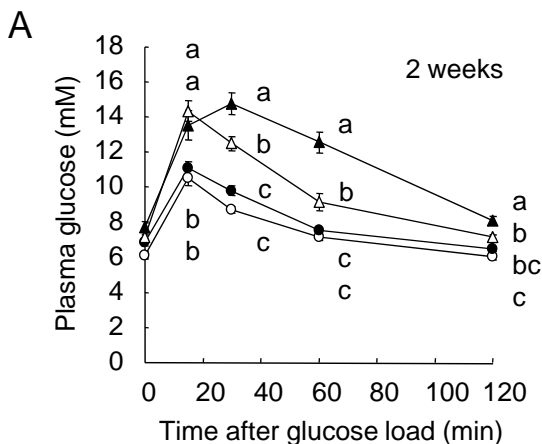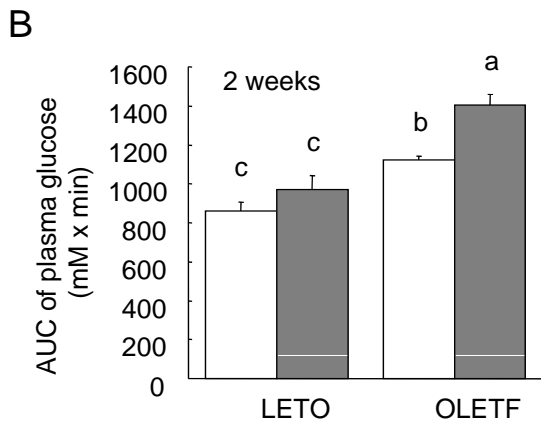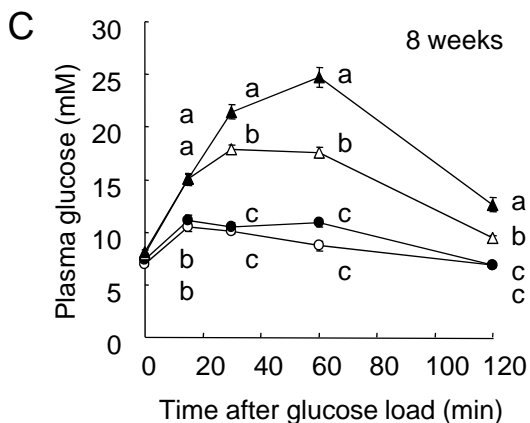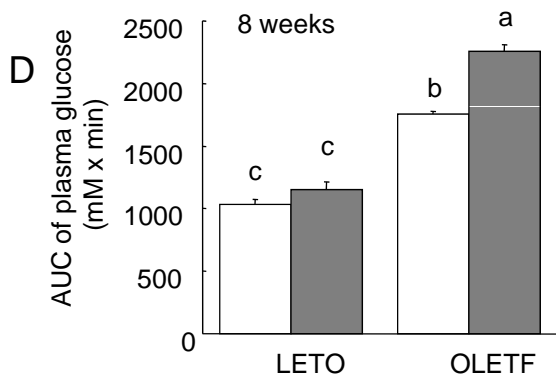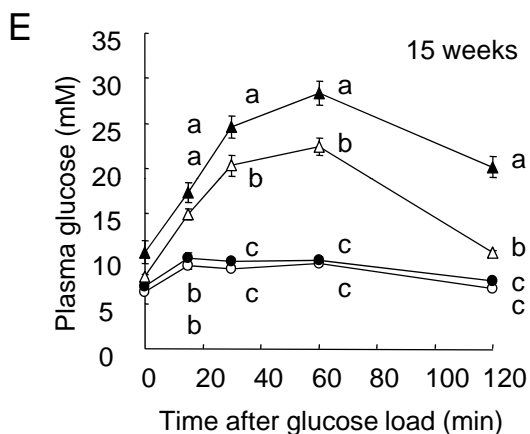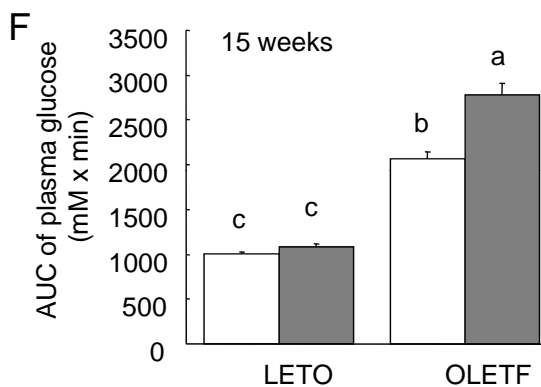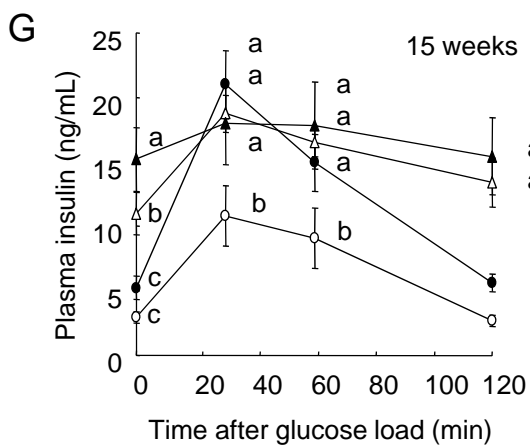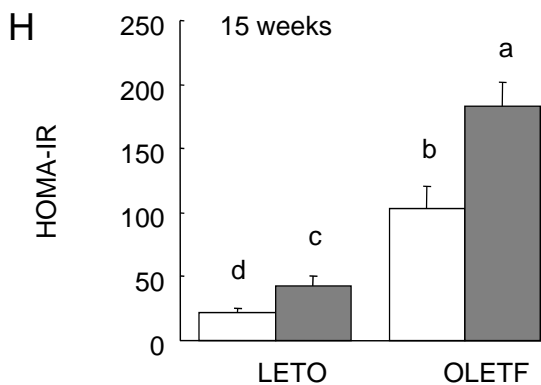

Supplement: MOESM1 [file 25655638]
